# Supplementary material
Source: Springer Nature journal article supplement (https://www.springermedizin.de/resource/supplementary/12936_2014_3277_MOESM1_ESM.pdf/9545520)

**FUNDING FLOWS:**

-  IMPLEMENTATION AND MONITORING
-  MONITORING, EVALUATION AND RESEARCH
-  MIXED IMPLEMENTATION, MONITORING EVALUATION AND RESEARCH

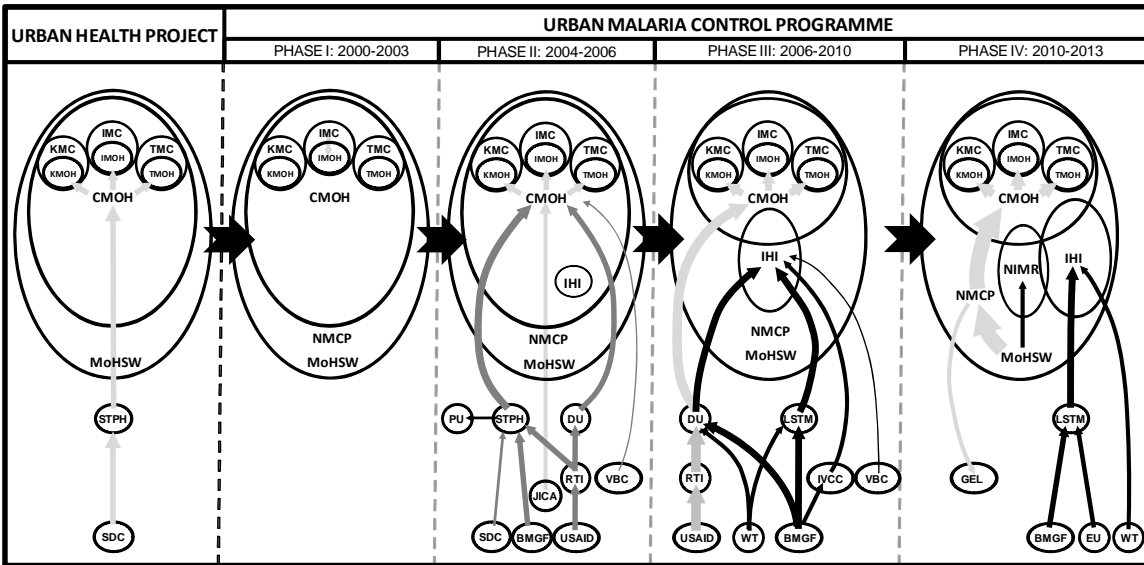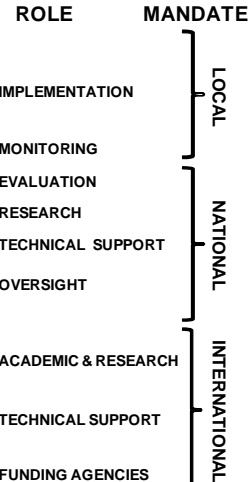

Supplement: MOESM1 [file 9545520]
